# Supplementary material for: Evaluation of Humoral and Cellular Immune Responses to the SARS-CoV-2 Vaccine in Patients With Common Variable Immunodeficiency Phenotype and Patient Receiving B-Cell Depletion Therapy
Source: PubMed Central journal article supplement (PMC9098934; doi:10.3389/fimmu.2022.895209), 2022-04-29

**Supplementary appendix Table S1. Univariate and multivariate analysis of factors contributing to cellular immune response after SARS-CoV-2 vaccination in patients with common variable immunodeficiency phenotype.**

| Variable                                            | Cellular immune response present<br>( <i>n</i> =20) | Deficient cellular immune response<br>( <i>n</i> =8) | Univariate analysis    |          | Multivariate analysis |          |
|-----------------------------------------------------|-----------------------------------------------------|------------------------------------------------------|------------------------|----------|-----------------------|----------|
|                                                     |                                                     |                                                      | OR                     | <i>p</i> | e <sup>β</sup>        | <i>p</i> |
| Age, yr; median (IQR)                               | 48.5 (40.5–70.5)                                    | 61.5 (42–65)                                         | n.a.                   | 0.709    | n.i.                  | 0.547    |
| Lymphocytes, x10 <sup>9</sup> cells/L; median (IQR) | 1.43 (1.07–2.44)                                    | 1.27 (0.90–2.00)                                     | n.a.                   | 0.354    | n.i.                  | 0.415    |
| Albumin, g/L; median (IQR)                          | 45.3 (42.5–48.2)                                    | 45.2 (42.5–46.2)                                     | n.a.                   | 0.784    | n.i.                  | 0.601    |
| Creatinine, μmol/L; median (IQR)                    | 70.5 (56–77)                                        | 77 (63–101)                                          | n.a.                   | 0.258    | n.i.                  | 0.062    |
| Immunoglobulin G, mg/L; median (IQR)                | 8602 (6339–10743)                                   | 7498 (7004–9950)                                     | n.a.                   | 1.000    | n.i.                  | 0.794    |
| Immunoglobulin M, mg/L; median (IQR)                | 207 (50–374)                                        | 257 (102–743)                                        | n.a.                   | 0.304    | n.i.                  | 0.106    |
| Immunoglobulin A, mg/L; median (IQR)                | 50 (50–725)                                         | 68.5 (50–717)                                        | n.a.                   | 0.901    | n.i.                  | 0.952    |
| CD3+, x10 <sup>6</sup> /L; median (IQR)             | 1063 (856–1940)                                     | 1098 (657–1699)                                      | n.a.                   | 0.438    | Ex.col.               | Ex.col.  |
| CD3+, %; median (IQR)                               | 79.5 (76.5–83.5)                                    | 85.0 (76.5–91.0)                                     | n.a.                   | 0.354    | n.i.                  | 0.185    |
| CD3+CD4+, x10 <sup>6</sup> /L; median (IQR)         | 648 (467–971)                                       | 408 (349–920)                                        | n.a.                   | 0.304    | n.i.                  | 0.725    |
| CD3+CD4+, %; median (IQR)                           | 42.0 (32.0–46.5)                                    | 43.0 (32.5–53.0)                                     | n.a.                   | 0.533    | Ex.col.               | Ex.col.  |
| CD3+CD4+, < 200x10 <sup>6</sup> /L; <i>n</i> (%)    | 1 (5.0)                                             | 0 (0.0)                                              | n.a.                   | 1.000    | Ex.col.               | Ex.col.  |
| CD3+CD4+CD45RA, < 10%; <i>n</i> (%)                 | 9 (45.0)                                            | 5 (62.5)                                             | 0.491<br>(0.091–2.636) | 0.678    | n.i.                  | 0.472    |
| CD3+CD8+, x10 <sup>6</sup> /L; median (IQR)         | 410 (267–861)                                       | 526 (240–782)                                        | n.a.                   | 1.000    | Ex.col.               | Ex.col.  |

|                                                                                                |                  |                  |                        |       |         |         |
|------------------------------------------------------------------------------------------------|------------------|------------------|------------------------|-------|---------|---------|
| CD3+CD8+, %; median (IQR)                                                                      | 30.5 (18.5–48.0) | 31.0 (22.0–47.0) | n.a.                   | 0.862 | n.i.    | 0.866   |
| (CD3+CD4+) / (CD3+CD8+), 1; median (IQR)                                                       | 1.41 (0.64–2.44) | 1.33 (0.73–2.46) | n.a.                   | 1.000 | Ex.col. | Ex.col. |
| NK (CD3-CD16+CD56+), x10 <sup>6</sup> /L; median (IQR)                                         | 150 (79–196)     | 85 (23–132)      | n.a.                   | 0.136 | n.i.    | 0.351   |
| NK (CD3-CD16+CD56+), %; median (IQR)                                                           | 7.0 (6.0–13.5)   | 4.5 (3.0–14.5)   | n.a.                   | 0.354 | Ex.col. | Ex.col. |
| CD19+, x10 <sup>6</sup> /L; median (IQR)                                                       | 145 (40.5–266)   | 72 (39–153)      | n.a.                   | 0.258 | Ex.col. | Ex.col. |
| CD19+, %; median (IQR)                                                                         | 10.5 (2.3–13.0)  | 8.0 (2.0–13.5)   | n.a.                   | 0.672 | Ex.col. | Ex.col. |
| CD19+, ≤ 1%; <i>n</i> (%)                                                                      | 3 (15.0)         | 2 (25.0)         | 0.529<br>(0.070–3.978) | 0.938 | n.i.    | 0.574   |
| Switched memory B cells (CD19+CD27+IgD-IgM-), ≤ 2%; <i>n</i> (%)                               | 10 (50.0)        | 5 (62.5)         | 0.600<br>(0.112–3.214) | 0.857 | n.i.    | 0.637   |
| Transitional B cells (CD19+CD24hiCD27-CD38hi), < 9 %; <i>n</i> (%)                             | 19 (95.0)        | 6 (75.0)         | 6.333<br>(0.485–82.75) | 0.385 | n.i.    | 0.136   |
| Activated B cells (CD19+CD21loCD38lo), > 10%; <i>n</i> (%)                                     | 0 (0.0)          | 1 (12.5)         | n.a.                   | 0.629 | n.i.    | 0.116   |
| Absent haemagglutinins; <i>n</i> (%)                                                           | 6 (31.6)         | 2 (25.0)         | 1.385<br>(0.213–8.983) | 1.000 | n.i.    | 0.732   |
| <i>Salmonella Typhi M</i> vaccine, deficient response; <i>n</i> (%)                            | 17 (85.0)        | 7 (87.5)         | 0.810<br>(0.071–9.180) | 1.000 | n.i.    | 0.882   |
| Number of days between the vaccine second dose and blood extraction for analysis; median (IQR) | 28 (28–34)       | 30 (28–33.5)     | n.a.                   | 0.409 | n.i.    | 0.527   |
| Immunoglobulin Replacement Therapy, yes; <i>n</i> (%)                                          | 16 (80.0)        | 7 (87.5)         | 0.571<br>(0.054–6.079) | 1.000 | n.i.    | 0.601   |

IQR; interquartile range; OR, odds ratio;  $e^{\beta}$ , multivariate odds ratio; n.a, not applicable; n.i., not included in the binary logistic regression equation; Ex.col.; variable excluded in the multivariate analysis to avoid multicollinearity.

**Supplementary appendix Table S2. Univariate and multivariate analysis of factors contributing to cellular and humoral immune response after SARS-CoV-2 vaccination in patients with common variable immunodeficiency phenotype.**

| Variable                                            | Present Cellular and Humoral immune response ( <i>n</i> =16) | Deficient Cellular or Humoral immune response ( <i>n</i> =12) | Univariate analysis    |          | Multivariate analysis |          |
|-----------------------------------------------------|--------------------------------------------------------------|---------------------------------------------------------------|------------------------|----------|-----------------------|----------|
|                                                     |                                                              |                                                               | OR                     | <i>p</i> | e <sup>β</sup>        | <i>p</i> |
| Age, yr; median (IQR)                               | 48.5 (39–69)                                                 | 61.5 (42–67.5)                                                | n.a.                   | 0.371    | n.i.                  | 0.973    |
| Lymphocytes, x10 <sup>9</sup> cells/L; median (IQR) | 1.43 (1.07–2.44)                                             | 1.38 (0.90–2.35)                                              | n.a.                   | 0.478    | n.i.                  | 0.823    |
| Albumin, g/L; median (IQR)                          | 45.3 (43.3–48.2)                                             | 45.2 (41.8–46.9)                                              | n.a.                   | 0.507    | n.i.                  | 0.234    |
| Creatinine, μmol/L; median (IQR)                    | 70.5 (56–77)                                                 | 71 (62.5–84.5)                                                | n.a.                   | 0.599    | n.i.                  | 0.256    |
| Immunoglobulin G, mg/L; median (IQR)                | 8853 (6011–10743)                                            | 7498 (7150–9950)                                              | n.a.                   | 0.873    | n.i.                  | 0.857    |
| Immunoglobulin M, mg/L; median (IQR)                | 272 (59–436)                                                 | 106 (50–393)                                                  | n.a.                   | 0.631    | n.i.                  | 0.922    |
| Immunoglobulin A, mg/L; median (IQR)                | 135 (50–909)                                                 | 50 (50–272)                                                   | n.a.                   | 0.302    | n.i.                  | 0.766    |
| CD3+, x10 <sup>6</sup> /L; median (IQR)             | 1016 (856–1615)                                              | 1204 (656–2005)                                               | n.a.                   | 0.698    | Ex.col.               | Ex.col.  |
| CD3+, %; median (IQR)                               | 79.0 (72.5–82.5)                                             | 83.0 (78.0–91.0)                                              | n.a.                   | 0.110    | n.i.                  | 0.393    |
| CD3+CD4+, x10 <sup>6</sup> /L; median (IQR)         | 648 (495–996)                                                | 443 (349–680)                                                 | n.a.                   | 0.159    | n.i.                  | 0.790    |
| CD3+CD4+, %; median (IQR)                           | 42.5 (36.5–47.5)                                             | 35.5 (28.5–50.0)                                              | n.a.                   | 0.324    | Ex.col.               | Ex.col.  |
| CD3+CD4+, < 200x10 <sup>6</sup> /L; <i>n</i> (%)    | 0 (0.0)                                                      | 1 (8.3)                                                       | n.a.                   | 0.883    | Ex.col.               | Ex.col.  |
| CD3+CD4+CD45RA, < 10%; <i>n</i> (%)                 | 7 (58.3)                                                     | 7 (43.8)                                                      | 1.800<br>(0.396–8.182) | 0.445    | n.i.                  | 0.890    |
| CD3+CD8+, x10 <sup>6</sup> /L; median (IQR)         | 385 (250–510)                                                | 563 (300–946)                                                 | n.a.                   | 0.347    | Ex.col.               | Ex.col.  |

|                                                                                                |                  |                  |                        |              |         |         |
|------------------------------------------------------------------------------------------------|------------------|------------------|------------------------|--------------|---------|---------|
| CD3+CD8+, %; median (IQR)                                                                      | 25.0 (16.5–40.5) | 42.0 (27.5–51.0) | n.a.                   | 0.100        | n.i.    | 0.958   |
| (CD3+CD4+) / (CD3+CD8+), 1; median (IQR)                                                       | 1.80 (0.97–2.69) | 0.82 (0.52–1.84) | n.a.                   | 0.114        | Ex.col. | Ex.col. |
| NK (CD3-CD16+CD56+), x10 <sup>6</sup> /L; median (IQR)                                         | 150 (68.5–196)   | 90 (54.6–159)    | n.a.                   | 0.423        | n.i.    | 0.479   |
| NK (CD3-CD16+CD56+), %; median (IQR)                                                           | 6.0 (6.0–12.5)   | 10.0 (3.0–15.5)  | n.a.                   | 0.873        | Ex.col. | Ex.col. |
| CD19+, x10 <sup>6</sup> /L; median (IQR)                                                       | 184 (105–297)    | 47.4 (2.7–108)   | n.a.                   | <b>0.001</b> | Ex.col. | Ex.col. |
| CD19+, %; median (IQR)                                                                         | 11.0 (9.0–13.5)  | 2.0 (0.5–10.5)   | n.a.                   | <b>0.013</b> | Ex.col. | Ex.col. |
| CD19+, ≤ 1%; <i>n</i> (%)                                                                      | 0 (0.0)          | 5 (41.7)         | n.a.                   | <b>0.019</b> | n.i.    | 1.000   |
| Switched memory B cells (CD19+CD27+IgD-IgM-), ≤ 2%; <i>n</i> (%)                               | 6 (37.5)         | 9 (75.0)         | 0.200<br>(0.038–1.044) | <b>0.049</b> | n.i.    | 0.452   |
| Transitional B cells (CD19+CD24 <sup>hi</sup> CD27-CD38 <sup>hi</sup> ), < 9 %; <i>n</i> (%)   | 15 (93.8)        | 10 (83.3)        | 3.003<br>(0.239–37.04) | 0.791        | n.i.    | 0.163   |
| Activated B cells (CD19+CD21 <sup>lo</sup> CD38 <sup>lo</sup> ), > 10%; <i>n</i> (%)           | 0 (0.0)          | 1 (8.3)          | n.a.                   | 0.883        | n.i.    | 0.134   |
| Absent haemagglutinins; <i>n</i> (%)                                                           | 4 (26.7)         | 4 (33.3)         | 0.881<br>(0.139–3.817) | 1.000        | n.i.    | 0.448   |
| <i>Salmonella Typhi M</i> vaccine, deficient response; <i>n</i> (%)                            | 14 (87.5)        | 11 (91.7)        | 0.635<br>(0.051–7.937) | 1.000        | n.i.    | 0.952   |
| Number of days between the vaccine second dose and blood extraction for analysis; median (IQR) | 28 (28–34)       | 29 (28–33)       | n.a.                   | 0.664        | n.i.    | 0.495   |
| Immunoglobulin Replacement Therapy, yes; <i>n</i> (%)                                          | 11 (68.8)        | 11 (91.7)        | 0.200<br>(0.020–2.004) | 0.319        | n.i.    | 0.519   |

IQR, interquartile range; OR, odds ratio; eβ, multivariate odds ratio; n.a, not applicable; n.i., not included in the binary logistic regression equation; Ex.col.; variable excluded in the multivariate analysis to avoid multicollinearity.

**Supplementary appendix Table S3. Univariate and multivariate analysis of factors contributing to humoral immune response after SARS-CoV-2 vaccination in patients with B-cell depleting therapy.**

| Variable                                            | Present Humoral immune response ( <i>n</i> =11) | Humoral immune response deficient ( <i>n</i> =13) | Univariate analysis    |          | Multivariate analysis |          |
|-----------------------------------------------------|-------------------------------------------------|---------------------------------------------------|------------------------|----------|-----------------------|----------|
|                                                     |                                                 |                                                   | OR                     | <i>p</i> | e <sup>β</sup>        | <i>p</i> |
| Age, yr; median (IQR)                               | 47 (44–55)                                      | 52 (47–56)                                        | n.a.                   | 0.277    | n.i.                  | 0.113    |
| Lymphocytes, x10 <sup>9</sup> cells/L; median (IQR) | 1.42 (1.16–1.65)                                | 1.57 (1.13–1.99)                                  | n.a.                   | 0.531    | n.i.                  | 0.161    |
| Albumin, g/L; median (IQR)                          | 46.4 (44.0–47.1)                                | 47.1 (44.3–48.1)                                  | n.a.                   | 0.207    | n.i.                  | 0.434    |
| Creatinine, μmol/L; median (IQR)                    | 59 (54–74)                                      | 58 (53–67)                                        | n.a.                   | 0.608    | n.i.                  | 0.810    |
| Immunoglobulin G, mg/L; median (IQR)                | 7283 (6275–9383)                                | 7849 (7253–8522)                                  | n.a.                   | 1.000    | n.i.                  | 0.970    |
| Immunoglobulin M, mg/L; median (IQR)                | 662 (349–971)                                   | 608 (231–706)                                     | n.a.                   | 0.277    | n.i.                  | 0.176    |
| Immunoglobulin A, mg/L; median (IQR)                | 1731 (1563–2023)                                | 1478 (1398–3154)                                  | n.a.                   | 0.569    | n.i.                  | 0.485    |
| CD3+, x10 <sup>6</sup> /L; median (IQR)             | 1132 (902–1269)                                 | 1386 (974–1518)                                   | n.a.                   | 0.331    | n.i.                  | 0.216    |
| CD3+, %; median (IQR)                               | 88.0 (77.5–91.0)                                | 87.0 (79.0–91.0)                                  | n.a.                   | 1.000    | Ex.col.               | Ex.col.  |
| CD3+CD4+, x10 <sup>6</sup> /L; median (IQR)         | 733 (683–928)                                   | 816 (689–1274)                                    | n.a.                   | 0.649    | Ex.col.               | Ex.col.  |
| CD3+CD4+, %; median (IQR)                           | 61.0 (54.0–65.5)                                | 54.0 (49.0–64.0)                                  | n.a.                   | 0.424    | n.i.                  | 0.154    |
| CD3+CD4+, < 200x10 <sup>6</sup> /L; <i>n</i> (%)    | 0 (0.0)                                         | 0 (0.0)                                           | n.a.                   | n.a.     | Ex.col.               | Ex.col.  |
| CD3+CD4+CD45RA, < 10%; <i>n</i> (%)                 | 1 (7.7)                                         | 1 (9.1)                                           | 1.000<br>(0.055–18.09) | 1.000    | n.i.                  | 0.467    |
| CD3+CD8+, x10 <sup>6</sup> /L; median (IQR)         | 276 (179–482)                                   | 339 (213–557)                                     | n.a.                   | 0.303    | Ex.col.               | Ex.col.  |

|                                                                                                          |                  |                  |                        |       |         |         |
|----------------------------------------------------------------------------------------------------------|------------------|------------------|------------------------|-------|---------|---------|
| CD3+CD8+, %; median (IQR)                                                                                | 20.0 (14.0–27.0) | 59 (54–74)       | n.a.                   | 0.361 | n.i.    | 0.181   |
| (CD3+CD4+) / (CD3+CD8+), 1; median (IQR)                                                                 | 2.95 (2.00–3.93) | 2.03 (1.46–3.25) | n.a.                   | 0.339 | Ex.col. | Ex.col. |
| NK (CD3-CD16+CD56+), x10 <sup>6</sup> /L; median (IQR)                                                   | 204 (92.1–271)   | 230 (116–300)    | n.a.                   | 0.776 | n.i.    | 0.276   |
| NK (CD3-CD16+CD56+), %; median (IQR)                                                                     | 10.0 (6.5–22.0)  | 11.0 (7.0–19.0)  | n.a.                   | 0.955 | Ex.col. | Ex.col. |
| CD19+, x10 <sup>6</sup> /L; median (IQR)                                                                 | 0 (0.0)          | 0 (0.0)          | n.a.                   | 1.000 | Ex.col. | Ex.col. |
| CD19+, %; median (IQR)                                                                                   | 0.0 (0.0–0.0)    | 0.0 (0.0–0.0)    | n.a.                   | 1.000 | Ex.col. | Ex.col. |
| CD19+, ≤ 1%; <i>n</i> (%)                                                                                | 11 (100.0)       | 13 (100.0)       | n.a.                   | n.a.  | n.a     | n.a     |
| Switched memory B cells (CD19+CD27+IgD-IgM-), ≤ 2%; <i>n</i> (%)                                         | 11 (100.0)       | 13 (100.0)       | n.a.                   | n.a.  | n.a     | n.a     |
| Transitional B cells (CD19+CD24hiCD27-CD38hi), < 9 %; <i>n</i> (%)                                       | 11 (100.0)       | 13 (100.0)       | n.a.                   | n.a.  | n.a     | n.a     |
| Activated B cells (CD19+CD21loCD38lo), > 10 %; <i>n</i> (%)                                              | 0 (0.0)          | 0 (0.0)          | n.a.                   | n.a.  | n.a     | n.a     |
| Absent haemagglutinins; <i>n</i> (%)                                                                     | 4 (36.4)         | 1 (8.3)          | 6.286<br>(0.577–68.42) | 0.262 | n.i.    | 0.596   |
| <i>Salmonella Typhi M</i> vaccine, deficient response; <i>n</i> (%)                                      | 5 (83.3)         | 13 (100.0)       | n.a.                   | 0.684 | n.i.    | 0.146   |
| Number of days between the vaccine second dose and blood extraction for analysis; median (IQR)           | 30 (29–33.5)     | 29 (28–34)       | n.a.                   | 0.874 | n.i.    | 0.692   |
| Number of days between the rituximab/ocrelizumab therapy and the first dose of the vaccine; median (IQR) | 116 (92–125)     | 121 (95–149)     | n.a.                   | 0.681 | n.i.    | 0.405   |
| Rituximab, yes; <i>n</i> (%)                                                                             | 2 (18.2)         | 5 (38.5)         | 0.356<br>(0.053–2.368) | 0.523 | n.i.    | 0.732   |

---

|                                |          |          |                        |       |      |       |
|--------------------------------|----------|----------|------------------------|-------|------|-------|
| Ocrelizumab, yes; <i>n</i> (%) | 9 (81.8) | 8 (61.5) | 2.813<br>(0.422–18.74) | 0.523 | n.i. | 0.732 |
|--------------------------------|----------|----------|------------------------|-------|------|-------|

---

IQR, interquartile range; OR, odds ratio;  $e^{\beta}$ , multivariate odds ratio; n.a, not applicable; n.i., not included in the binary logistic regression equation; Ex.col.; variable excluded in the multivariate analysis to avoid multicollinearity.



**Supplementary appendix Table S4. Univariate and multivariate analysis of factors contributing to cellular immune response after SARS-CoV-2 vaccination in patients with B-cell depleting therapy.**

| Variable                                            | Cellular immune response present<br>( <i>n</i> =23) | Deficient cellular immune response<br>( <i>n</i> =1) | Univariate analysis |          | Multivariate analysis |          |
|-----------------------------------------------------|-----------------------------------------------------|------------------------------------------------------|---------------------|----------|-----------------------|----------|
|                                                     |                                                     |                                                      | OR                  | <i>p</i> | e <sup>β</sup>        | <i>P</i> |
| Age, yr; median (IQR)                               | 50 (46–55.5)                                        | 59                                                   | n.a.                | 0.333    | n.i.                  | 0.345    |
| Lymphocytes, x10 <sup>9</sup> cells/L; median (IQR) | 1.48 (1.18–1.78)                                    | 1.07                                                 | n.a.                | 0.417    | n.i.                  | 0.485    |
| Albumin, g/L; median (IQR)                          | 46.8 (44.0–47.6)                                    | 47.4                                                 | n.a.                | 0.583    | n.i.                  | 0.437    |
| Creatinine, μmol/L; median (IQR)                    | 59 (54.5–71.5)                                      | 47                                                   | n.a.                | 0.167    | n.i.                  | 0.299    |
| Immunoglobulin G, mg/L; median (IQR)                | 7822 (6759–9019)                                    | 7849                                                 | n.a.                | 1.000    | n.i.                  | 0.921    |
| Immunoglobulin M, mg/L; median (IQR)                | 609 (291–781)                                       | 436                                                  | n.a.                | 0.833    | n.i.                  | 0.649    |
| Immunoglobulin A, mg/L; median (IQR)                | 1674 (1432–2503)                                    | 1603                                                 | n.a.                | 1.000    | n.i.                  | 0.851    |
| CD3+, x10 <sup>6</sup> /L; median (IQR)             | 1265 (940–1474)                                     | 974                                                  | n.a.                | 0.667    | Ex.col.               | Ex.col.  |
| CD3+, %; median (IQR)                               | 87.0 (291–781)                                      | 91.0                                                 | n.a.                | 0.500    | n.i.                  | 0.586    |
| CD3+CD4+, x10 <sup>6</sup> /L; median (IQR)         | 787 (691–1133)                                      | 514                                                  | n.a.                | 0.333    | n.i.                  | 0.241    |
| CD3+CD4+, %; median (IQR)                           | 60.0 (50.5–65.0)                                    | 48.0                                                 | n.a.                | 0.417    | Ex.col.               | Ex.col.  |
| CD3+CD4+, < 200x10 <sup>6</sup> /L; <i>n</i> (%)    | 0 (0.0)                                             | 0 (0.0)                                              | n.a.                | n.a.     | Ex.col.               | Ex.col.  |
| CD3+CD4+CD45RA, < 10%; <i>n</i> (%)                 | 2 (8.7)                                             | 0 (0.0)                                              | n.a.                | 1.000    | n.i.                  | 0.803    |
| CD3+CD8+, x10 <sup>6</sup> /L; median (IQR)         | 279 (202–537)                                       | 417                                                  | n.a.                | 0.833    | Ex.col.               | Ex.col.  |
| CD3+CD8+, %; median (IQR)                           | 23.0 (14.0–30.5)                                    | 39.0                                                 | n.a.                | 0.083    | n.i.                  | 0.115    |

|                                                                                                          |                  |           |      |       |         |         |
|----------------------------------------------------------------------------------------------------------|------------------|-----------|------|-------|---------|---------|
| (CD3+CD4+) / (CD3+CD8+), 1; median (IQR)                                                                 | 2.85 (1.63–3.93) | 1.23      | n.a. | 0.129 | Ex.col. | Ex.col. |
| NK (CD3-CD16+CD56+), x10 <sup>6</sup> /L; median (IQR)                                                   | 230 (113–295)    | 75        | n.a. | 0.417 | n.i.    | 0.328   |
| NK (CD3-CD16+CD56+), %; median (IQR)                                                                     | 11.0 (7.0–22.0)  | 7.0       | n.a. | 0.583 | Ex.col. | Ex.col. |
| CD19+, x10 <sup>6</sup> /L; median (IQR)                                                                 | 0 (0–0)          | 0 (0.0)   | n.a. | 1.000 | Ex.col. | Ex.col. |
| CD19+, %; median (IQR)                                                                                   | 0.0 (0.0–0.0)    | 0.0       | n.a. | 1.000 | Ex.col. | Ex.col. |
| CD19+, ≤ 1%; n (%)                                                                                       | 23 (100.0)       | 1 (100.0) | n.a. | n.a.  | n.a.    | n.a.    |
| Switched memory B cells (CD19+CD27+IgD-IgM-), ≤ 2%; n (%)                                                | 23 (100.0)       | 1 (100.0) | n.a. | n.a.  | n.a.    | n.a.    |
| Transitional B cells (CD19+CD24hiCD27-CD38hi), < 9 %; n (%)                                              | 23 (100.0)       | 1 (100.0) | n.a. | n.a.  | n.a.    | n.a.    |
| Activated B cells (CD19+CD21loCD38lo), > 10%; n (%)                                                      | 0 (0.0)          | 0 (0.0)   | n.a. | n.a.  | n.a.    | n.a.    |
| Absent haemagglutinins; n (%)                                                                            | 5 (22.7)         | 0 (0.0)   | n.a. | 1.000 | n.i.    | 0.716   |
| <i>Salmonella Typhi M</i> vaccine, deficient response; n (%)                                             | 17 (94.4)        | 1 (100.0) | n.a. | 1.000 | n.i.    | 0.803   |
| Number of days between the vaccine second dose and blood extraction for analysis; median (IQR)           | 29 (28–33.5)     | 34        | n.a. | 0.833 | n.i.    | 0.556   |
| Number of days between the rituximab/ocrelizumab therapy and the first dose of the vaccine; median (IQR) | 118 (96–139)     | 114       | n.a. | 0.875 | n.i.    | 0.699   |
| Rituximab, yes; n (%)                                                                                    | 6 (26.1)         | 1 (100.0) | n.a. | 0.640 | n.i.    | 0.197   |
| Ocrelizumab, yes; n (%)                                                                                  | 17 (73.9)        | 0 (0.0)   | n.a. | 0.640 | n.i.    | 0.197   |

IQR, interquartile range; OR, odds ratio; e<sup>β</sup>, multivariate odds ratio; n.a, not applicable; n.i., not included in the binary logistic regression equation; Ex.col.; variable excluded in the multivariate analysis to avoid multicollinearity.

**Supplementary appendix Table S5. Univariate and multivariate analysis of factors contributing to cellular and humoral immune response after SARS-CoV-2 vaccination in patients with B-cell depleting therapy.**

| Variable                                            | Present Cellular and Humoral immune response ( <i>n</i> =11) | Deficient Cellular or Humoral immune response ( <i>n</i> =13) | Univariate analysis    |          | Multivariate analysis |          |
|-----------------------------------------------------|--------------------------------------------------------------|---------------------------------------------------------------|------------------------|----------|-----------------------|----------|
|                                                     |                                                              |                                                               | OR                     | <i>p</i> | e <sup>β</sup>        | <i>p</i> |
| Age, yr; median (IQR)                               | 47 (44–55)                                                   | 52 (47–56)                                                    | n.a.                   | 0.277    | n.i.                  | 0.113    |
| Lymphocytes, x10 <sup>9</sup> cells/L; median (IQR) | 1.42 (1.16–1.65)                                             | 1.57 (1.13–1.99)                                              | n.a.                   | 0.531    | n.i.                  | 0.161    |
| Albumin, g/L; median (IQR)                          | 46.4 (44.0–47.1)                                             | 46.4 (44.0–48.1)                                              | n.a.                   | 0.207    | n.i.                  | 0.434    |
| Creatinine, μmol/L; median (IQR)                    | 59 (54–74)                                                   | 58 (53–67)                                                    | n.a.                   | 0.608    | n.i.                  | 0.810    |
| Immunoglobulin G, mg/L; median (IQR)                | 7283 (6275–9383)                                             | 7849 (7253–8522)                                              | n.a.                   | 1.000    | n.i.                  | 0.970    |
| Immunoglobulin M, mg/L; median (IQR)                | 662 (349–971)                                                | 608 (231–706)                                                 | n.a.                   | 0.277    | n.i.                  | 0.176    |
| Immunoglobulin A, mg/L; median (IQR)                | 1731 (1563–2023)                                             | 1478 (1397–3154)                                              | n.a.                   | 0.569    | n.i.                  | 0.485    |
| CD3+, x10 <sup>6</sup> /L; median (IQR)             | 1132 (902–1269)                                              | 1386 (974–1518)                                               | n.a.                   | 0.331    | n.i.                  | 0.216    |
| CD3+, %; median (IQR)                               | 88.0 (77.5–91.0)                                             | 87.0 (79.0–91.0)                                              | n.a.                   | 1.000    | Ex.col.               | Ex.col.  |
| CD3+CD4+, x10 <sup>6</sup> /L; median (IQR)         | 733 (683–928)                                                | 816 (689–1274)                                                | n.a.                   | 0.649    | Ex.col.               | Ex.col.  |
| CD3+CD4+, %; median (IQR)                           | 61.0 (54.0–65.5)                                             | 54.0 (49.0–64.0)                                              | n.a.                   | 0.424    | n.i.                  | 0.154    |
| CD3+CD4+, < 200x10 <sup>6</sup> /L; <i>n</i> (%)    | 0 (0.0)                                                      | 0 (0.0)                                                       | n.a.                   | n.a.     | Ex.col.               | Ex.col.  |
| CD3+CD4+CD45RA, < 10%; <i>n</i> (%)                 | 1 (9.1)                                                      | 1 (7.7)                                                       | 1.200<br>(0.066–21.74) | 1.000    | n.i.                  | 0.467    |
| CD3+CD8+, x10 <sup>6</sup> /L; median (IQR)         | 276 (179–482)                                                | 339 (213–557)                                                 | n.a.                   | 0.303    | n.i.                  | 0.181    |

|                                                                                                          |                  |                  |                        |       |         |         |
|----------------------------------------------------------------------------------------------------------|------------------|------------------|------------------------|-------|---------|---------|
| CD3+CD8+, %; median (IQR)                                                                                | 20.0 (14.0–27.0) | 28.0 (16.0–32.0) | n.a.                   | 0.361 | Ex.col. | Ex.col. |
| (CD3+CD4+) / (CD3+CD8+), 1; median (IQR)                                                                 | 2.03 (1.46–3.25) | 2.95 (2.43–3.93) | n.a.                   | 0.339 | Ex.col. | Ex.col. |
| NK (CD3-CD16+CD56+), x10 <sup>6</sup> /L; median (IQR)                                                   | 204 (92–271)     | 230 (116–300)    | n.a.                   | 0.776 | n.i.    | 0.276   |
| NK (CD3-CD16+CD56+), %; median (IQR)                                                                     | 10.0 (6.5–22.0)  | 11.0 (7.0–19.0)  | n.a.                   | 0.955 | Ex.col. | Ex.col. |
| CD19+, x10 <sup>6</sup> /L; median (IQR)                                                                 | 0 (0–0)          | 0 (0.0)          | n.a.                   | 1.000 | Ex.col. | Ex.col. |
| CD19+, %; median (IQR)                                                                                   | 0.0 (0.0–0.0)    | 0.0 (0.0–0.0)    | n.a.                   | 1.000 | Ex.col. | Ex.col. |
| CD19+, ≤ 1%; <i>n</i> (%)                                                                                | 11 (100.0)       | 13 (100.0)       | n.a.                   | n.a.  | n.a     | n.a     |
| Switched memory B cells (CD19+CD27+IgD-IgM-), ≤ 2%; <i>n</i> (%)                                         | 11 (100.0)       | 13 (100.0)       | n.a.                   | n.a.  | n.a     | n.a     |
| Transitional B cells (CD19+CD24hiCD27-CD38hi), < 9 %; <i>n</i> (%)                                       | 11 (100.0)       | 13 (100.0)       | n.a.                   | n.a.  | n.a     | n.a     |
| Activated B cells (CD19+CD21loCD38lo), > 10%; <i>n</i> (%)                                               | 0 (0.0)          | 0 (0.0)          | n.a.                   | n.a.  | n.a     | n.a     |
| Absent haemagglutinins; <i>n</i> (%)                                                                     | 4 (36.4)         | 1 (8.3)          | 6.289<br>(0.577–66.66) | 0.262 | n.i.    | 0.596   |
| <i>Salmonella Typhi M</i> vaccine, deficient response; <i>n</i> (%)                                      | 5 (83.3)         | 13 (100.0)       | n.a.                   | 0.684 | n.i.    | 0.146   |
| Number of days between the vaccine second dose and blood extraction for analysis; median (IQR)           | 30 (29–33.5)     | 29 (28–34)       | n.a.                   | 0.691 | n.i.    | 0.692   |
| Number of days between the rituximab/ocrelizumab therapy and the first dose of the vaccine; median (IQR) | 115 (97–125)     | 122 (96–147)     | n.a.                   | 0.705 | n.i.    | 0.689   |
| Rituximab, yes; <i>n</i> (%)                                                                             | 2 (18.2)         | 5 (38.5)         | 0.355<br>(0.053–2.369) | 0.523 | n.i.    | 0.732   |

---

|                                |          |          |                        |       |      |       |
|--------------------------------|----------|----------|------------------------|-------|------|-------|
| Ocrelizumab, yes; <i>n</i> (%) | 9 (91.8) | 8 (61.5) | 2.809<br>(0.422–18.87) | 0.523 | n.i. | 0.732 |
|--------------------------------|----------|----------|------------------------|-------|------|-------|

---

IQR, interquartile range; OR, odds ratio;  $e^{\beta}$ , multivariate odds ratio; n.a, not applicable; n.i., not included in the binary logistic regression equation; Ex.col.; variable excluded in the multivariate analysis to avoid multicollinearity.

**Supplementary appendix Table S6. Adverse events related to SARS-CoV-2 vaccine administration.**

| <b>Total Adverse Events</b>                 | <b>Number</b> | <b>Adverse Events After 1st Dose</b>        | <b>Number</b> | <b>Adverse Events After 2nd Dose</b>        | <b>Number</b> |
|---------------------------------------------|---------------|---------------------------------------------|---------------|---------------------------------------------|---------------|
| Pain/redness/swelling at the injection site | 38            | Pain/redness/swelling at the injection site | 17            | Pain/redness/swelling at the injection site | 21            |
| General discomfort                          | 30            | General discomfort                          | 5             | General discomfort                          | 25            |
| Fever                                       | 21            | Fever                                       | 1             | Fever                                       | 20            |
| Arthromyalgia                               | 10            | Arthromyalgia                               | 3             | Arthromyalgia                               | 7             |
| Headache                                    | 8             | Headache                                    | 2             | Headache                                    | 6             |
| Low-grade fever                             | 8             | Low-grade fever                             | 0             | Low-grade fever                             | 8             |
| Asthenia/weakness                           | 8             | Asthenia/weakness                           | 0             | Asthenia/weakness                           | 8             |
| Dysthermia                                  | 5             | Dysthermia                                  | 2             | Dysthermia                                  | 3             |
| Shortness of breath                         | 2             | Shortness of breath                         | 1             | Shortness of breath                         | 1             |
| Cough                                       | 2             | Cough                                       | 1             | Cough                                       | 1             |
| Paraesthesia                                | 2             | Paraesthesia                                | 1             | Paraesthesia                                | 1             |
| Sickness/Nausea                             | 2             | Sickness/Nausea                             | 0             | Sickness/Nausea                             | 2             |
| Chills                                      | 2             | Chills                                      | 0             | Chills                                      | 2             |
| Temporal worsening of neurological focality | 2             | Temporal worsening of neurological focality | 0             | Temporal worsening of neurological focality | 2             |
| Dizziness                                   | 1             | Dizziness                                   | 1             | Dizziness                                   | 0             |
| Itching/pruritus                            | 1             | Itching/pruritus                            | 0             | Itching/pruritus                            | 1             |
| <b>Total AE Number</b>                      | <b>142</b>    | <b>Total AE after 1<sup>st</sup> Dose</b>   | <b>34</b>     | <b>Total AE After 2<sup>nd</sup> Dose</b>   | <b>108</b>    |

AE, adverse event.

**Supplementary figure 1.** IgG anti-S titers (A) and percentage of humoral response (B) depending on the CD3+ cells in patients with common variable immunodeficiency phenotype.

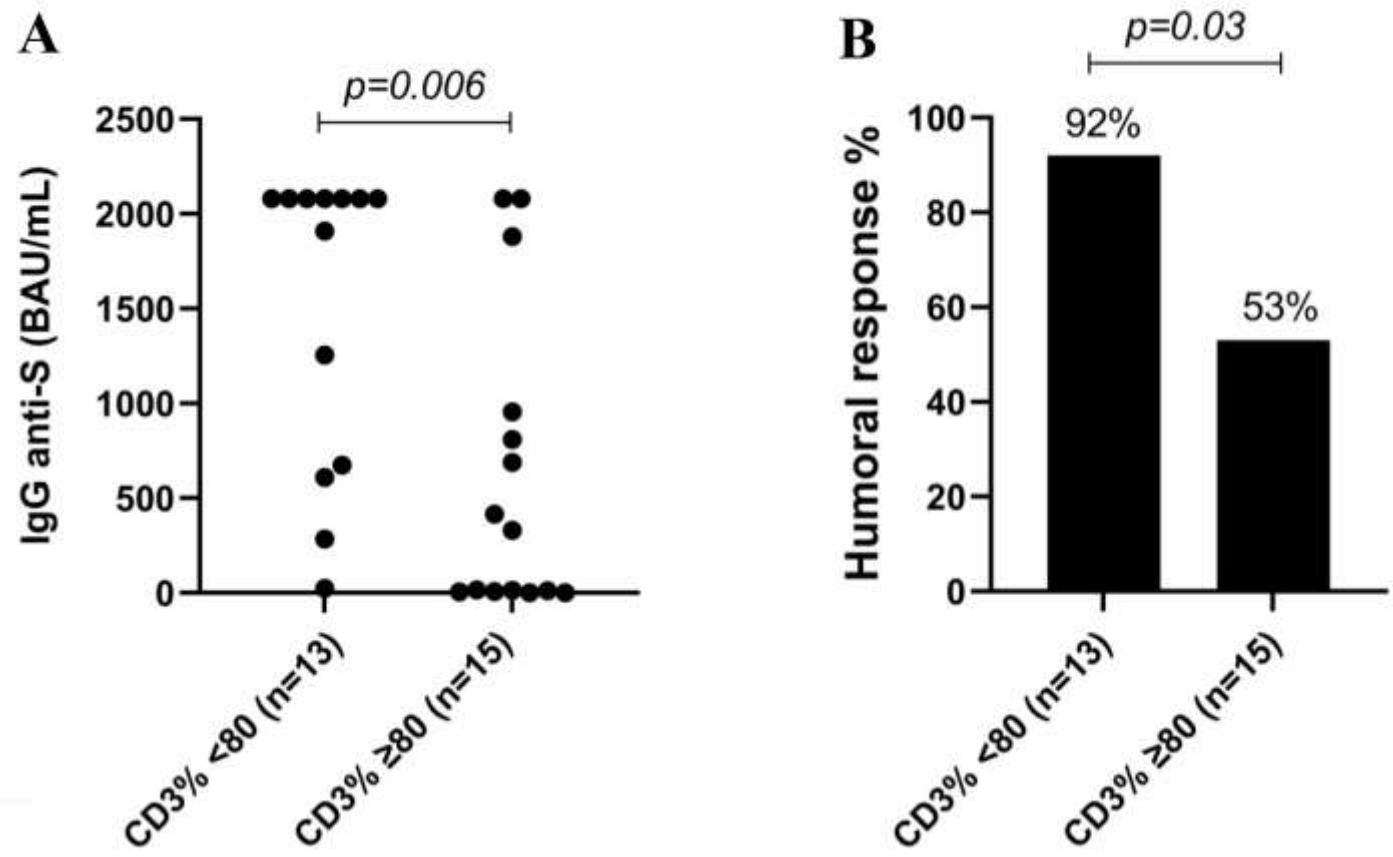

Supplement: DataSheet_1.pdf [file DataSheet_1.pdf]
